# Supplementary material for: Silver Oxide Coatings with High Silver-Ion Elution Rates and Characterization of Bactericidal Activity
Source: PubMed Central journal article supplement (PMC6151401; doi:10.3390/molecules22091487), 2017-09-07
Supplement: molecules-22-01487-s001.pdf [file molecules-22-01487-s001.pdf]

# Silver oxide coatings with high silver-ion elution rates and characterization of bactericidal activity

Sarah S. Goderecci <sup>1†</sup>, Eric Kaiser<sup>2†</sup>, Michael Yanakas<sup>2</sup>, Zachary Norris<sup>2</sup>, Jeffrey Scaturro<sup>2</sup>, Robert Oszust<sup>2</sup>, Clarence D. Medina<sup>1</sup>, Fallon Waechter<sup>1</sup>, Min Heon<sup>6</sup>, Lei Yu<sup>1</sup>, Samuel E. Lofland<sup>2</sup>, Renee M. Demarest<sup>4</sup>, Robert R. Krchnavek <sup>3</sup>, Gregory A. Caputo <sup>1,5\*</sup> and Jeffrey D. Hettinger <sup>2,5\*</sup>

## Supplemental Figures and Tables

**A**

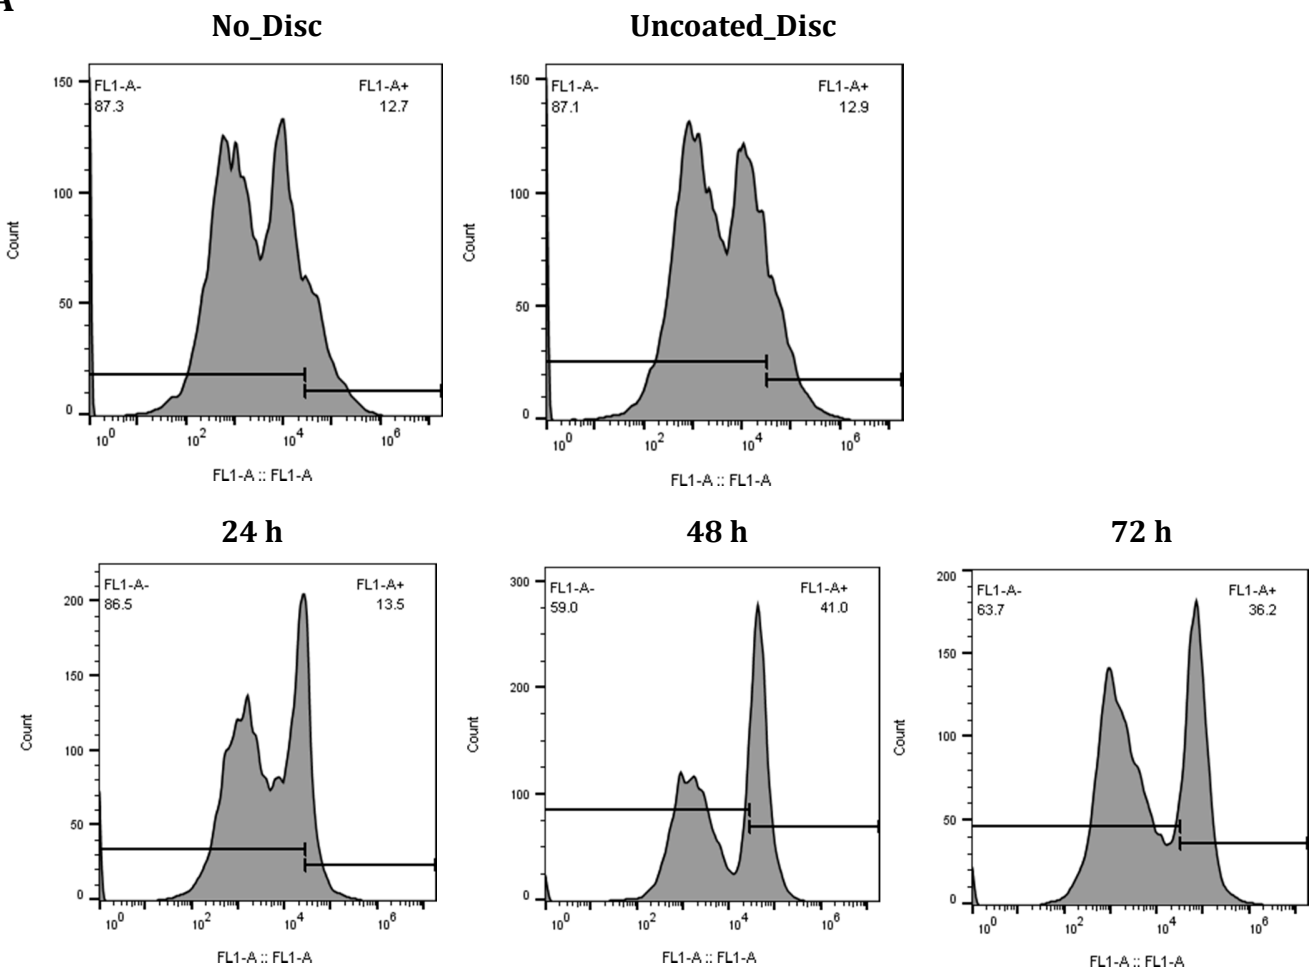

**B**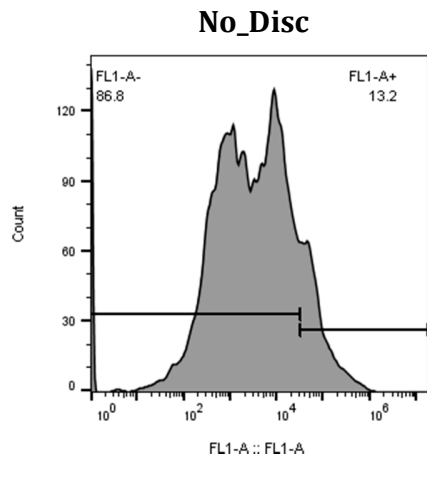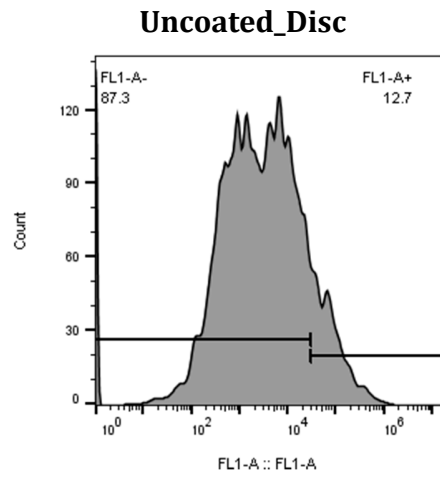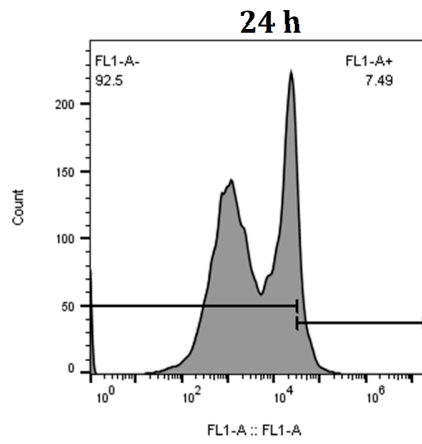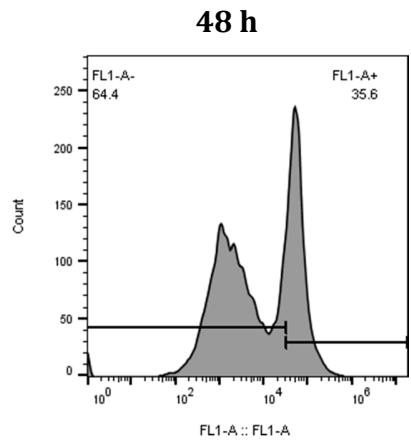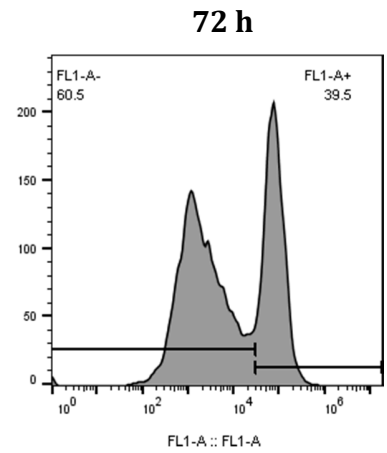**No\_Disc****Uncoated\_Disc****C**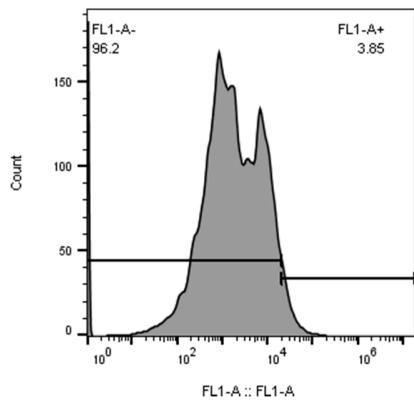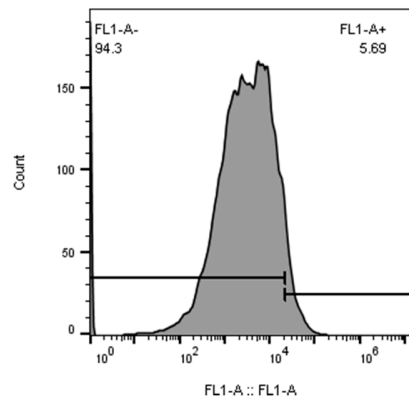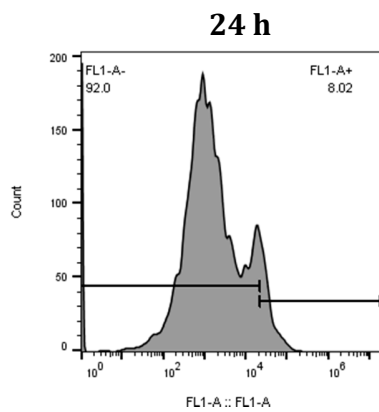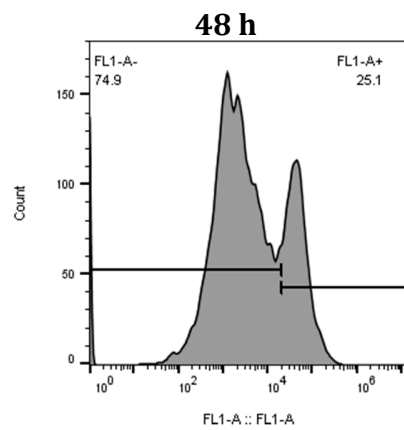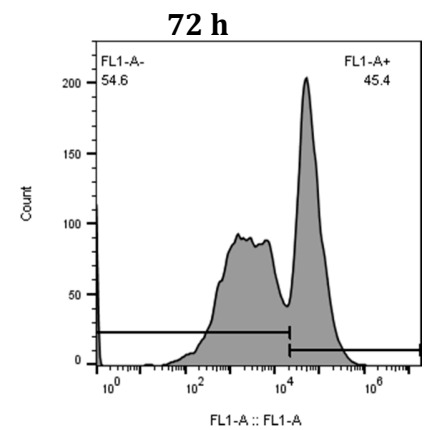

Supplemental Figure 1 - Histograms from flow cytometric analysis used to generate graphs in Figure 7. Panels A, B, and C are the three separate replicates used.

Supplemental Table 1

| Table S1                                         |                                     |          |                                   |
|--------------------------------------------------|-------------------------------------|----------|-----------------------------------|
| Elution rate of Ag ions in different media types |                                     |          |                                   |
| Media Type                                       | Elution Rate (ppm/min) <sup>a</sup> |          | R <sup>2</sup> Value <sup>a</sup> |
| Water                                            | 7.55E-02                            | ± 0.0071 | 0.998                             |
| PBS                                              | 3.34E-02                            | ± 0.0058 | 1.000                             |
| LB Broth                                         | 4.55E-03                            | ± 0.0011 | 0.995                             |
| DMEM                                             | 3.65E-03                            | ± 0.0006 | 0.996                             |

a – Rates and R<sup>2</sup> values presented are the average of the rates R<sup>2</sup> values of each individual replicate of elution experiments (3-6 replicates).
